# Supplementary material
Source: Research Square preprint supplement (doi:10.21203/rs.3.rs-9431979/v1)
Supplement: Supplementary file 1 [file 52b7beedb1e405d7ec130f3d.xlsx]

## Sheet: TableS2
Species Name	Host Spp	Location	Marine or Freshwater	Zoosporangium size	Primary	Secondary zoospore size	No Discharge tubes
and Reference					zoospore size
M. nipponica	Leptocylindrus sp.	Sagami Bay (Japan)	SW	15–19 µm long	3–4 µm long	2–2.5 µm in diameter	1 (2)
				6.5–7.5 µm broad	1–2 µm broad
M. blauvikensis	Fragilaria capucina	Fáskúðsfjörður (Iceland)	SW	12–22 μm long	3–4 μm μm long	Not observed	1
(Buaya and Thines 2022)				8–12 μm broad	2–3 μm broad
M. einbuarlaekurica	Ulnaria ulna	Víkurskarð (Iceland)	FW	150–200 µm long	Not specified	2–4 µm long	1-Multiple
(Buaya and Thines 2022)	Synedra sp.			5–20 µm in diameter		2–3 µm broad
M. helgolandica	PseudoNitzschia sp.	Helgoland (Germany)	SW	2–4 μm wide	3–4(5) μm length	Not observed	1
(Buaya et al. 2017)				3–5 μm long	2–3 μm wide
M. islandica	Minidiscus sp.	Skagastrond (Iceland)	SW	25–50 μm long	3 μm long	Not observed	1
(Buaya et al. 2021)				20–45 μm diameter	5 μm broad
M. moenusica	Pleurosira laevis	Frankfurt (Germany)	FW	Up to 100 µm long	2–3 µm in diameter	Not observed	1
(Buaya and Thines 2018)
M. polaris	Melosira sp.	Fáskúðsfjörður (Iceland)	SW	15–50 μm long	5–8 µm in diameter	6–8 µm long	Multiple
(Buaya and Thines 2024)				20–70 μm in diameter		5–7 µm broad
Table S2. Morphological and ecological comparison between formally described Miracula spp. (Seawater as SW and Freshwater as FW).
