# Supplementary material
Source: Research Square preprint supplement (doi:10.21203/rs.3.rs-9431979/v1)
Supplement: Supplementary file 2 [file 71fe2f1f7345dae7937365ab.xlsx]

## Sheet: SPP table
Order	Genus	Spp	Accession Number	Full name	Source
Peronosporales	Myzocytiopsis	venatrix	EU271960	Myzocytiopsis_venatrix_[EU271960]	Beakes et al. 2006
Peronosporales	Lagenidium	sp	KT257379	Lagenidium_sp_[KT257379]	Spies et al. 2015
Peronosporales	Lagenidium	caudatum	EU271961	Lagenidium_caudatum_[EU271961]	Beakes et al. 2006
Peronosporales	Lagenidium	giganteum	KT257332	Lagenidium_giganteum_[KT257332]	Spies et al. 2015
Peronosporales	Myzocytiopsis	humicola	KT257375	Myzocytiopsis_humicola_[KT257375]	Spies et al. 2015
Peronosporales	Myzocytiopsis	glutinospora	KT257371	Myzocytiopsis_glutinospora_[KT257371]	Spies et al. 2015
Peronosporales	Phytopythium	megacarpum	HQ643388	Phytopythium_megacarpum_[HQ643388]	Robideau et al. 2011
Peronosporales	Phytopythium	sindhum	HQ643396	Phytopythium_sindhum_[HQ643396]	Robideau et al. 2011
Peronosporales	Phytopythium	helicoides	AY598665	Phytopythium_helicoides_[AY598665]	Levesque et al. 2004
Peronosporales	Phytopythium	vexans	HQ643400	Phytopythium_vexans_[HQ643400]	Robideau et al. 2011
Peronosporales	Lagenidium	sp	KJ716870	Lagenidium_sp_[KJ716870]	Hyde et al. 2014
Peronosporales	Lagenidium	sp	KJ716873	Lagenidium_sp_[KJ716873]	Hyde et al. 2014
Peronosporales	Lagena	ausuennarstadhirensis	ON392457	Lagena_ausuennarstadhirensis_[ON392457]	Thines and Buaya 2022
Peronosporales	Lagena	radicicola	KJ716869	Lagena_radicicola_[KJ716869]	Hyde et al. 2014
Saprolegniales	Pythiopsis	terrestris	KP098378	Pythiopsis_terrestris_[KP098378]	Steciow et al. 2014
Saprolegniales	Protoachlya	paradoxa	KP098375	Protoachlya_paradoxa_[KP098375]	Steciow et al. 2014
Saprolegniales	Saprolegnia	parasitica	AB086899	Saprolegnia_parasitica_[AB086899]	Khomvilai et al. 2005
Saprolegniales	Newbya	apiculata	AJ238656	Newbya_apiculata_[AJ238656]	Dick et al. 1999
Saprolegniales	Newbya	omata	KP098365	Newbya_omata_[KP098365]	Steciow et al. 2014
Saprolegniales	Leptolegnia	chapmanii	AJ238660	Leptolegnia_chapmanii_[AJ238660]	Dick et al. 1999
Saprolegniales	Leptolegenia	caudata	AJ238659	Leptolegenia_caudata_[AJ238659]	Dick et al. 1999
Saprolegniales	Cokeria	sparrowii	KP098380	Cokeria_sparrowii_[KP098380]	Steciow et al. 2014
Saprolegniales	Aphanomyces	astaci	XR_717099	Aphanomyces_astaci_[XR_717099]	Russ et al. 2012
Saprolegniales	Aphanomyces	invadans	XR_608067	Aphanomyces_invadans_[XR_608067]	Russ et al. 2012
Saprolegniales	Aphanomycopsis	bacillariacearum	MW307772	Aphanomycopsis_bacillariacearum_[MW307772]	Buaya et al. 2021
Saprolegniales	Aquastella	acicularis	KF294791	Aquastella_acicularis_[KF294791]	Molloy et al. 2014
Saprolegniales	Aquastella	attenuata	KF294792	Aquastella_attenuata_[KF294792]	Molloy et al. 2014
Leptomitales	Apodachlya	brachynema	AJ238663	Apodachlya_brachynema_[AJ238663]	Dick et al. 1999
Leptomitales	Leptomitales	sp	MK990103	Leptomitales_sp_[MK990103]	Martin and Warren 2020
Leptomitales	Ectrogella	bacillariacearum	MK253531	Ectrogella_bacillariacearum_[MK253531]	Buaya and Thines 2020
Leptomitales	Chlamydomyzium	sp	JQ031283	Chlamydomyzium_sp_[JQ031283]	Beakes et al. 2014
Leptomitales	Lagenisma	coscinodisci	KT273921	Lagenisma_coscinodisci_[KT273921]	Thines et al. 2015
Leptomitales	Atkinsiella	dubia	AB284575	Atkinsiella_dubia_[AB284575]	Muraosa et al. 2012
Leptomitales	Bolbea	parasitica	MN688695	Bolbea_parasitica_[MN688695]	Buaya and Thines 2020
Haliphthorales	Haliphthoros	milfordensis	AB178868	Haliphthoros_milfordensis_[AB178868]	Skimoto et al. 2007
Haliphthorales	Haliphthoros	sp	AB284579	Haliphthoros_sp_[AB284579]	Muraosa et al. 2012
Haliphthorales	Halocrusticida	parasitica	AB284576	Halocrusticida_parasitica_[AB284576]	Nakamura and Hatai 1994
Haliphthorales	Halocrusticida	baliensis	AB284578	Halocrusticida_baliensis_[AB284578]	Hatai et al. 2000
Haliphthorales	Halodaphnea	panulirata	AB284574	Halodaphnea_panulirata_[AB284574]	Kitancharoen and Hatai 1995
Pontismatales	Sirolpidium	heterosiphoniae	MF838767	Sirolpidium_heterosiphoniae_[MF838767]	Klochkova et al. 2017
Pontismatales	Sirolpidium	feldmanni	KM210530	Sirolpidium_feldmanni_[KM210530]	Fletcher et al. 2015
Pontismatales	Sirolpidium	pyropiae	KR029826	Sirolpidium_pyropiae_[KR029826]	Klochkova et al. 2016
Pontismatales	Sirolpidium	pyropiae	KR029827	Sirolpidium_pyropiae_[KR029827]	Klochkova et al. 2016
Pontismatales	Sirolpidium	bryosdidis	MW489460	Sirolpidium_bryosdidis_[MW489460]	Buaya et al. 2021
Pontismatales	Sirolpidium	lagenidoides	MK253530	Sirolpidium_lagenidoides_[MK253530]	Buaya et al. 2019
Pontismatales	Sirolpidium	blauvikense	OP508155	Sirolpidium_blauvikense_[OP508155]	Buaya et al. 2023
Pontismatales	Sirolpidium	porphyrae_koreanae	KY569073	Sirolpidium_porphyrae_koreanae_[KY569073]	Kwak et al. 2017
Pontismatales	Sirolpidium	porphyrae	AB287418	Sirolpidium_porphyrae_[AB287418]	Sekimoto et al. 2008
incerte sedis	Diatomophthora	perforans	MN764292	Diatomophthora_perforans_[MN764292]	Buaya et al. 2020
incerte sedis	Diatomophthora	perforans	MN764290	Diatomophthora_perforans_[MN764290]	Buaya et al. 2020
incerte sedis	Diatomophthora	perforans_destruens	MN764245	Diatomophthora_perforans_destruens_[MN764245]	Buaya et al. 2020
incerte sedis	Diatomophthora	perforans_destruens	MN764256	Diatomophthora_perforans_destruens_[MN764256]	Buaya et al. 2020
incerte sedis	Diatomophthora	perforans_norvegica	MN764298	Diatomophthora_perforans_norvegica_[MN764298]	Buaya et al. 2020
incerte sedis	Diatomophthora	perforans_pleurosigmae	MN764291	Diatomophthora_perforans_pleurosigmae_[MN764291]	Buaya et al. 2020
Anisolpidiales	Diatomophthora	debesii	MF926410	Diatomophthora_debesii_[MF926410]	Buaya et al. 2017
Anisolpidiales	Diatomophthora	gillii	MH971238	Diatomophthora_gillii_[MH971238]	Buaya et al. 2019
Anisolpidiales	Anisolpidium	rosenvingei	KU752534	Anisolpidium_rosenvingei_[KU752534]	Gachon et al. 2015
Anisolpidiales	Anisolpidium	rosenvingei	KU764783	Anisolpidium_rosenvingei_[KU764783]	Gachon et al. 2015
Anisolpidiales	Anisolpidium	ectocaprii	KU764786	Anisolpidium_ectocaprii_[KU764786]	Gachon et al. 2015
Haptoglossales	Haptoglossa	zoospora	AB425201	Haptoglossa_zoospora_[AB425201]	Hakariya et al. 2009
Haptoglossales	Haptoglossa	zoospora	KT257318	Haptoglossa_zoospora_[KT257318]	Spies et al. 2015
Haptoglossales	Haptoglossa	heterospora	AB425199	Haptoglossa_heterospora_[AB425199]	Hakariya et al. 2009
Eurychasmatales	Eurychasma	dicksonii	AB368176	Eurychasma_dicksonii_[AB368176]	Sekimoto et al. 2008
Olpidiopsidales	Olpidiopsis	saprolegniae	MK253535	Olpidiopsis_saprolegniae_[MK253535]	Buaya et al. 2019
Olpidiopsidales	Olpidiopsis	saprolegniae	MK253534	Olpidiopsis_saprolegniae_[MK253534]	Buaya et al. 2019
Olpidiopsidales	Olpidiopsis	saprolegniae	MK253527	Olpidiopsis_saprolegniae_[MK253527]	Buaya et al. 2019
Olpidiopsidales	Olpidiopsis	saprolegniae	MK569503	Olpidiopsis_saprolegniae_[MK569503]	Buaya et al. 2019
Olpidiopsidales	Olpidiopsis	pathogenetica	MK602659	Olpidiopsis_pathogenetica_[MK602659]	Buaya et al. 2019
Rhipidiales	Salispina	intermedia	KT886045	Salispina_intermedia_[KT886045]	Marano et al. 2014
Rhipidiales	Sapromyces	elongatus	AB548399	Sapromyces_elongatus_[AB548399]	Sekimoto 2010
Miraculales	Miracula	helgolandica	MF926411	Miracula_helgolandica_[MF926411]	Buaya et al. 2017
Miraculales	Single-cell	Melo1Para	MF960907	Single-cell_Melo1Para_[MF960907]	Garvetto et al. 2018
Miraculales	Uncultured	He000427_201	AJ965010	Uncultured_He000427_201_[AJ965010]	Medlin et al. 2006
Miraculales	Miracula	islandica	MW620066	Miracula_islandica_[MW620066]	Buaya et al. 2017
Miraculales	Single-cell	Ect6Para	MF960903	Single-cell_Ect6Para_[MF960903]	Garvetto et al. 2018
Miraculales	Miracula	moenusica	MK239934	Miracula_moenusica_[MK239934]	Buaya et al. 2019
Miraculales	Miracula	polaris	PP492446	Miracula_polaris_[PP492446]	Buaya et al. 2024
Miraculales	Miracula	polaris	PP492447	Miracula_polaris_[PP492447]	Buaya et al. 2024
Miraculales	Miracula	einbuarlaekurica	MW671553	Miracula_einbuarlaekurica_[MW671553]	Buaya et al. 2022
Miraculales	Miracula	einbuarlaekurica	MW671554	Miracula_einbuarlaekurica_[MW671554]	Buaya et al. 2022
Miraculales	Miracula	blauvikensis	OP908040	Miracula_blauvikensis_[OP908040]	Buaya et al. 2022
Miraculales	Single-cell	13-374	MF960905	Single-cell_13-374_[MF960905]	Garvetto et al. 2018
Miraculales	Single-cell	10-045	MF960902	Single-cell_10-045_[MF960902]	Garvetto et al. 2018
Miraculales	Single-cell	S10InfLicSC6	MK733271	Single-cell_S10InfLicSC6_[MK733271]	Garvetto et al. 2020
Miraculales	Single-cell	S10InfLicSC	MK733272	Single-cell_S10InfLicSC_[MK733272]	Garvetto et al. 2020
Miraculales	Single-cell	S10InfFrLic	MK733270	Single-cell_S10InfFrLic_[MK733270]	Garvetto et al. 2020
Hyphochytriales	Rhizidiomyces	apophysatus	AF163295	Rhizidiomyces_apophysatus_[AF163295]	Hausner et al. 2000
Hyphochytriales	Hyphochytrium	catenoides	PP033743	Hyphochytrium_catenoides_[PP033743]	Dirks et al. 2023
Table S1. Oomycetes phylogenetic analysis data
References:
Beakes, G. W., Glockling, S. L., & James, T. Y. (2006). The phylogeny of oomycete nematode pathogens. In Proceedings of the 8th International Mycological Congress. Medimond International, Bologna (pp. 7-14).
Beakes, G. W., Glockling, S. L., & James, T. Y. (2014). A new oomycete species parasitic in nematodes, Chlamydomyzium dictyuchoides sp. nov.: developmental biology and phylogenetic studies. Fungal Biology, 118(7), 527-543.
Buaya, A. T., & Thines, M. (2019). Miracula moenusica, a new member of the holocarpic parasitoid genus from the invasive freshwater diatom Pleurosira laevis. Fungal systematics and evolution, 3(1), 35-40.
Buaya, A. T., & Thines, M. (2020). Bolbea parasitica gen. et sp. nov., a cultivable holocarpic parasitoid of the early-diverging Saprolegniomycetes. Fungal Systematics and Evolution, 6(1), 129-137.
Buaya, A. T., & Thines, M. (2020). Diatomophthoraceae–a new family of olpidiopsis-like diatom parasitoids largely unrelated to Ectrogella. Fungal systematics and evolution, 5(1), 113-118.
Buaya, A. T., & Thines, M. (2022). Miracula einbuarlaekurica sp. nov., a new holocarpic endoparasitoid species from pennate freshwater diatoms in Iceland. Mycology, 13(2), 153-161.
Buaya, A. T., Ploch, S., & Thines, M. (2019). Rediscovery and phylogenetic placement of Olpidiopsis gillii (de Wildeman) Friedmann, a holocarpic oomycete parasitoid of freshwater diatoms. Mycoscience, 60(3), 141-146.
Buaya, A. T., Ploch, S., Hanic, L., Nam, B., Nigrelli, L., Kraberg, A., & Thines, M. (2017). Phylogeny of Miracula helgolandica gen. et sp. nov. and Olpidiopsis drebesii sp. nov., two basal oomycete parasitoids of marine diatoms, with notes on the taxonomy of Ectrogella-like species. Mycological Progress, 16(11), 1041-1050.
Buaya, A. T., Ploch, S., Inaba, S., & Thines, M. (2019). Holocarpic oomycete parasitoids of red algae are not Olpidiopsis. Fungal systematics and evolution, 4(1), 21-31.
Buaya, A. T., Ploch, S., Kraberg, A., & Thines, M. (2020). Phylogeny and cultivation of the holocarpic oomycete Diatomophthora perforans comb. nov., an endoparasitoid of marine diatoms. Mycological Progress, 19(5), 441-454.
Buaya, A. T., Scholz, B., & Thines, M. (2021). A New Marine Species of Miracula (Oomycota) Parasitic to Minidiscus sp. in Icelandtitle. Mycobiology, 49(4), 355-362.
Buaya, A. T., Scholz, B., & Thines, M. (2021). Sirolpidium bryopsidis, a parasite of green algae, is probably conspecific with Pontisma lagenidioides, a parasite of red algae. Fungal Systematics and Evolution, 7(1), 223-231.
Buaya, A. T., Scholz, B., & Thines, M. (2021). Taxonomy and phylogeny of Aphanomycopsis bacillariacearum, a holocarpic oomycete parasitoid of the freshwater diatom genus Pinnularia. Mycological Progress, 20(3), 289-298.
Buaya, A., & Thines, M. (2022). Miracula blauvikensis: a new species of Miracula from Iceland, and report of a co-cultivation system for studying oomycete-diatom interactions. Fungal Systematics and Evolution, 10(1), 169-175.
Buaya, A., & Thines, M. (2024). Miracula polaris–A New Species of Miracula from the East Fjords of Iceland. Mycobiology, 52(2), 117-123.
Buaya, A., Tsai, I., & Thines, M. (2023). Pontisma blauvikense sp. nov. the first member of the early‐diverging oomycete genus Pontisma parasitizing brown algae. Journal of Eukaryotic Microbiology, 70(2), e12957.
Dick, M. W., Vick, M. C., Gibbings, J. G., Hedderson, T. A., & Lastra, C. C. L. (1999). 18S rDNA for species of Leptolegnia and other Peronosporomycetes: justification for the subclass taxa Saprolegniomycetidae and Peronosporomycetidae and division of the Saprolegniaceae sensu lato into the Leptolegniaceae and Saprolegniaceae. Mycological research, 103(9), 1119-1125.
Dirks, A. C. (2023). Alden Dirks Personal Collection. GenBank Direct Submission.
Fletcher, K., Tsirigoti, A., Antolić, B., Katsaros, C., Nikolić, V., van West, P., & Küpper, F. C. (2015). New record and phylogenetic affinities of the oomycete Olpidiopsis feldmanni infecting Asparagopsis sp.(Rhodophyta). Diseases of aquatic organisms, 117(1), 45-57.
Gachon, C. M., Fletcher, K. I., Badis, Y., van West, P., & Mueller, D. G. (2015). The pathogens of brown algae Anisolpidium ectocarpii and Anisolpidium rosenvingei define a new class of marine anteriorly uniciliate oomycetes. European journal of phycology, 50(sup 1), 25-26.
Garvetto, A., Nezan, E., Badis, Y., Bilien, G., Arce, P., Bresnan, E., Gachon, C., & Siano, R. (2018). Novel widespread marine oomycetes parasitising diatoms, including the toxic genus Pseudo-nitzschia: genetic, morphological, and ecological characterisation. Frontiers in microbiology, 9, 2918.
Garvetto, A., Perrineau, M. M., Dressler‐Allame, M., Bresnan, E., & Gachon, C. M. (2020). “Ectrogella” parasitoids of the diatom Licmophora sp. are polyphyletic. Journal of Eukaryotic Microbiology, 67(1), 18-27.
Hakariya, M., Hirose, D., & Tokumasu, S. (2009). Molecular phylogeny of terrestrial holocarpic endoparasitic peronosporomycetes, Haptoglossa spp., inferred from 18S rDNA. Mycoscience, 50(2), 130-136.
Hatai, K., Roza, D., & Nakayama, T. (2000). Identification of lower fungi isolated from larvae of mangrove crab, Scylla serrate, in Indonesia. Mycoscience, 41(6), 565-572.
Hausner, G., Belkhiri, A., & Klassen, G. R. (2000). Phylogenetic analysis of the small subunit ribosomal RNA gene of the hyphochytrid Rhizidiomyces apophysatus. Canadian Journal of Botany, 78(1), 124-128.
Hyde, K. D., Nilsson, R. H., Alias, S. A., Ariyawansa, H. A., Blair, J. E., Cai, L., et al. (2014). One stop shop: backbones trees for important phytopathogenic genera: I (2014). Fungal Diversity, 67(1), 21-125.
Khomvilai, C., Karita, S., Kashiwagi, M., & Yoshioka, M. (2005). Fungicidal effects of sodium hypochlorite solution on Saprolegnia isolated from eggs of chum salmon Oncorhynchus keta. Fisheries science, 71(5).
Kitancharoen, N., & Hatai, K. (1995). A marine oomycete Atkinsiella panulirata sp. nov. from philozoma of spiny lobster, Panulirus japonicus. Mycoscience, 36(1), 97-104.
Klochkova, T. A., Kwak, M. S., & Kim, G. H. (2017). A new endoparasite Olpidiopsis heterosiphoniae sp. nov. that infects red algae in Korea. Algal Research, 28, 264-269.
Klochkova, T. A., Shin, Y. J., Moon, K. H., Motomura, T., & Kim, G. H. (2016). New species of unicellular obligate parasite, Olpidiopsis pyropiae sp. nov., that plagues Pyropia sea farms in Korea. Journal of Applied Phycology, 28(1), 73-83.
Kwak, M. S., Klochkova, T. A., Jeong, S., & Kim, G. H. (2017). Olpidiopsis porphyrae var. koreanae, an endemic endoparasite infecting cultivated Pyropia yezoensis in Korea. Journal of Applied Phycology, 29(4), 2003-2012.
Levesque, C. A., & De Cock, A. W. (2004). Molecular phylogeny and taxonomy of the genus Pythium. Mycological research, 108(12), 1363-1383.
Marano, A. V., Jesus, A. L., de Souza, J. I., Jerónimo, G. H., et al. (2014). Diversity of Oomycota in a mangrove swamp area of the 'Parque Estadual da Ilha do Cardoso' (PEIC), Cananeia, Sao Paulo State, Brazil. GenBank Direct Submission.
Martin, W. W., & Warren, A. (2020). Periplasma, gen. nov., a new oomycete lineage with isogamous sexual reproduction. Mycologia, 112(5), 989-1002.
Medlin, L. K., Metfies, K., Mehl, H., Wiltshire, K., & Valentin, K. (2006). Picoeukaryotic plankton diversity at the Helgoland time series site as assessed by three molecular methods. Microbial ecology, 52(1), 53-71.
Molloy, D. P., Glockling, S. L., Siegfried, C. A., Beakes, G. W., James, T. Y., Mastitsky, S. E., Wurdak, E., Giamberini, L., Gaylo, M.J., & Nemeth, M. J. (2014). Aquastella gen. nov.: a new genus of saprolegniaceous oomycete rotifer parasites related to Aphanomyces, with unique sporangial outgrowths. Fungal Biology, 118(7), 544-558.
Muraosa, Y., Sano, A., & Hatai, K. (2012). Molecular identification of marine crustacean-pathogenic peronosporomycetes using DNA sequences of ITS1 and their pathogenicity for nauplii of brine shrimps. Fish Pathology, 47(2), 41-48.
Nakamura, K., & Hatai, K. (1994). Atkinsiella parasitica sp. nov. isolated from a rotifer, Brachionus plicatilis. Mycoscience, 35(4), 383-389.
Robideau, G. P., De Cock, A. W., Coffey, M. D., Voglmayr, H., Brouwer, H., Bala, K., ... & André Lévesque, C. (2011). DNA barcoding of oomycetes with cytochrome c oxidase subunit I and internal transcribed spacer. Molecular ecology resources, 11(6), 1002-1011.
Russ, C., Tyler, B., van West, P., Dieguez-Uribeondo, J., et al. (2012). The Genome Sequence of Aphanomyces astaci APO3. GenBank Direct Submission.
Sekimoto, S. (2010). The taxonomy and phylogeny of the marine holocarpic oomycetes. GenBank Direct Submission.
Sekimoto, S., Beakes, G. W., Gachon, C. M., Müller, D. G., Küpper, F. C., & Honda, D. (2008). The development, ultrastructural cytology, and molecular phylogeny of the basal oomycete Eurychasma dicksonii, infecting the filamentous phaeophyte algae Ectocarpus siliculosus and Pylaiella littoralis. Protist, 159(2), 299-318.
Sekimoto, S., Hatai, K., & Honda, D. (2007). Molecular phylogeny of an unidentified Haliphthoros-like marine oomycete and Haliphthoros milfordensis inferred from nuclear-encoded small-and large-subunit rRNA genes and mitochondrial-encoded cox2 gene. Mycoscience, 48(4), 212-221.
Sekimoto, S., Yokoo, K., Kawamura, Y., & Honda, D. (2008). Taxonomy, molecular phylogeny, and ultrastructural morphology of Olpidiopsis porphyrae sp. nov.(Oomycetes, straminipiles), a unicellular obligate endoparasite of Bangia and Porphyra spp.(Bangiales, Rhodophyta). Mycological Research, 112(3), 361-374.
Spies, C. F. J., Grooters, A. M., Levesque, A., Rintoul, T. L., Glockling, S. L., Chen, C. Y., & de Cock, A. W. A. M. (2015). Molecular characterization of novel oomycetes pathogenic to mammals. GenBank Direct Submission.
Steciow, M. M., Lara, E., Paul, C., Pillonel, A., & Belbahri, L. (2014). Multiple barcode assessment within the Saprolegnia-Achlya clade (Saprolegniales, Oomycota, Straminipila) brings order in a neglected group of pathogens. IMA fungus, 5(2), 439-448.
Thines, M., & Buaya, A. T. (2022). Lagena—an overlooked oomycete genus with a wide range of hosts. Mycological Progress, 21(8), 66.
Thines, M., Nam, B., Nigrelli, L., Beakes, G., & Kraberg, A. (2015). The diatom parasite Lagenisma coscinodisci (Lagenismatales, Oomycota) is an early diverging lineage of the Saprolegniomycetes. Mycological Progress, 14(9), 75.
